# Supplementary material for: Crystal and solution structures reveal oligomerization of individual capsid homology domains of Drosophila Arc
Source: PubMed Central journal article supplement (PMC8121366; doi:10.1371/journal.pone.0251459), 2021-05-14
Supplement: pone.0251459.s001.pdf [file pone.0251459.s001.pdf]

**S1 Table. The expression constructs used in the current study.**

| Construct     | Uniprot entry | Residues | N-terminal extension |
|---------------|---------------|----------|----------------------|
| dArc1-NL      | Q7K1U0        | 51-122   | SGSG                 |
| dArc1-CL      | Q7K1U0        | 123-208  | SGSG                 |
| dArc2-NL      | Q7JV70        | 38-109   | S                    |
| dArc2-CL      | Q7JV70        | 110-193  | SGSG                 |
| hArc-NL       | Q7LC44        | 207-277  | GAMG                 |
| hArc-CL       | Q7LC44        | 277-370  | GAM                  |
| dArc1 (NL+CL) | Q7K1U0        | 51-208   | S                    |
| dArc2 (NL+CL) | Q7JV70        | 38-193   | -                    |
