# Supplementary material for: Crystal and solution structures reveal oligomerization of individual capsid homology domains of Drosophila Arc
Source: PubMed Central journal article supplement (PMC8121366; doi:10.1371/journal.pone.0251459), 2021-05-14
Supplement: pone.0251459.s002.pdf [file pone.0251459.s002.pdf]

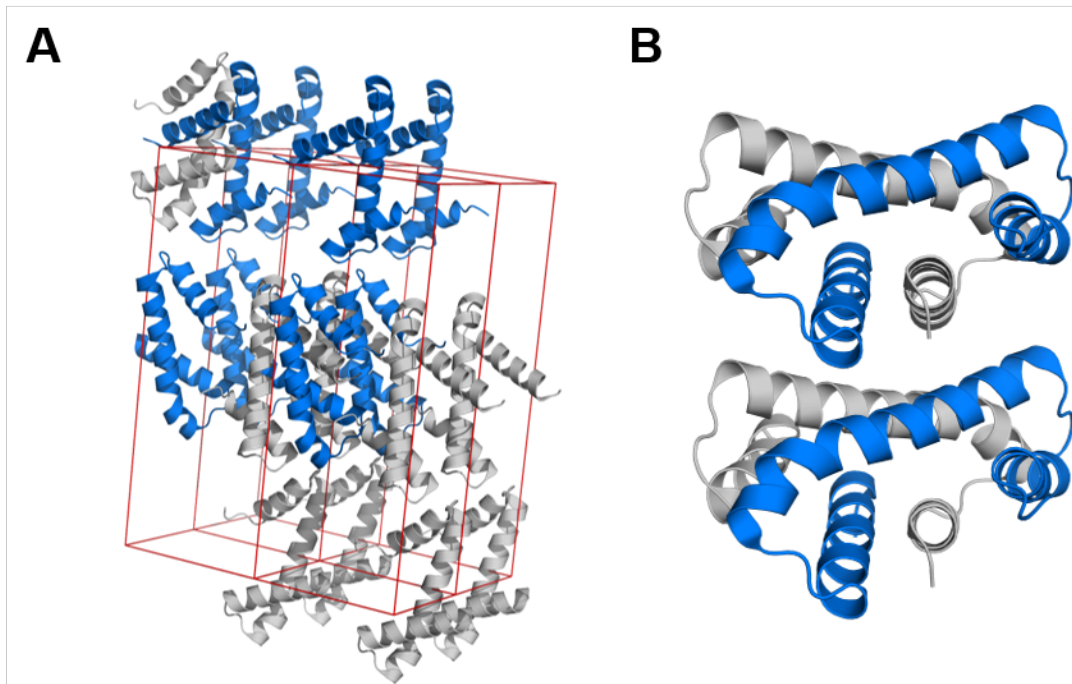

**S1 Fig. Crystal packing in dArc2-NL.** (A) The unit cell. (B) Stacking of dArc2-NL domain-swapped dimers in the lattice.
