# Supplementary material for: Crystal and solution structures reveal oligomerization of individual capsid homology domains of Drosophila Arc
Source: PubMed Central journal article supplement (PMC8121366; doi:10.1371/journal.pone.0251459), 2021-05-14
Supplement: pone.0251459.s003.pdf [file pone.0251459.s003.pdf]

**A**

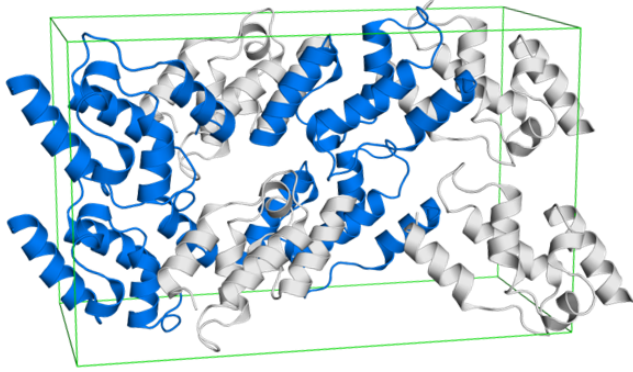

**B**

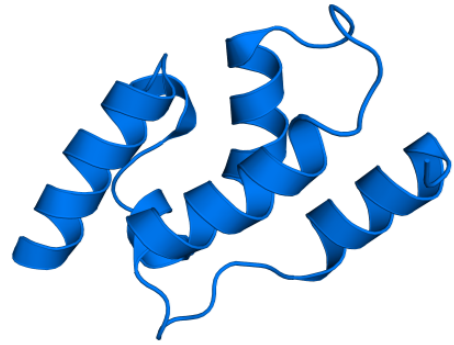

**S2 Fig.** Crystal packing in dArc1-CL. (A) The unit cell. (B) A monomer of dArc1-CL.
