# Supplementary material for: Crystal and solution structures reveal oligomerization of individual capsid homology domains of Drosophila Arc
Source: PubMed Central journal article supplement (PMC8121366; doi:10.1371/journal.pone.0251459), 2021-05-14
Supplement: pone.0251459.s004.pdf [file pone.0251459.s004.pdf]

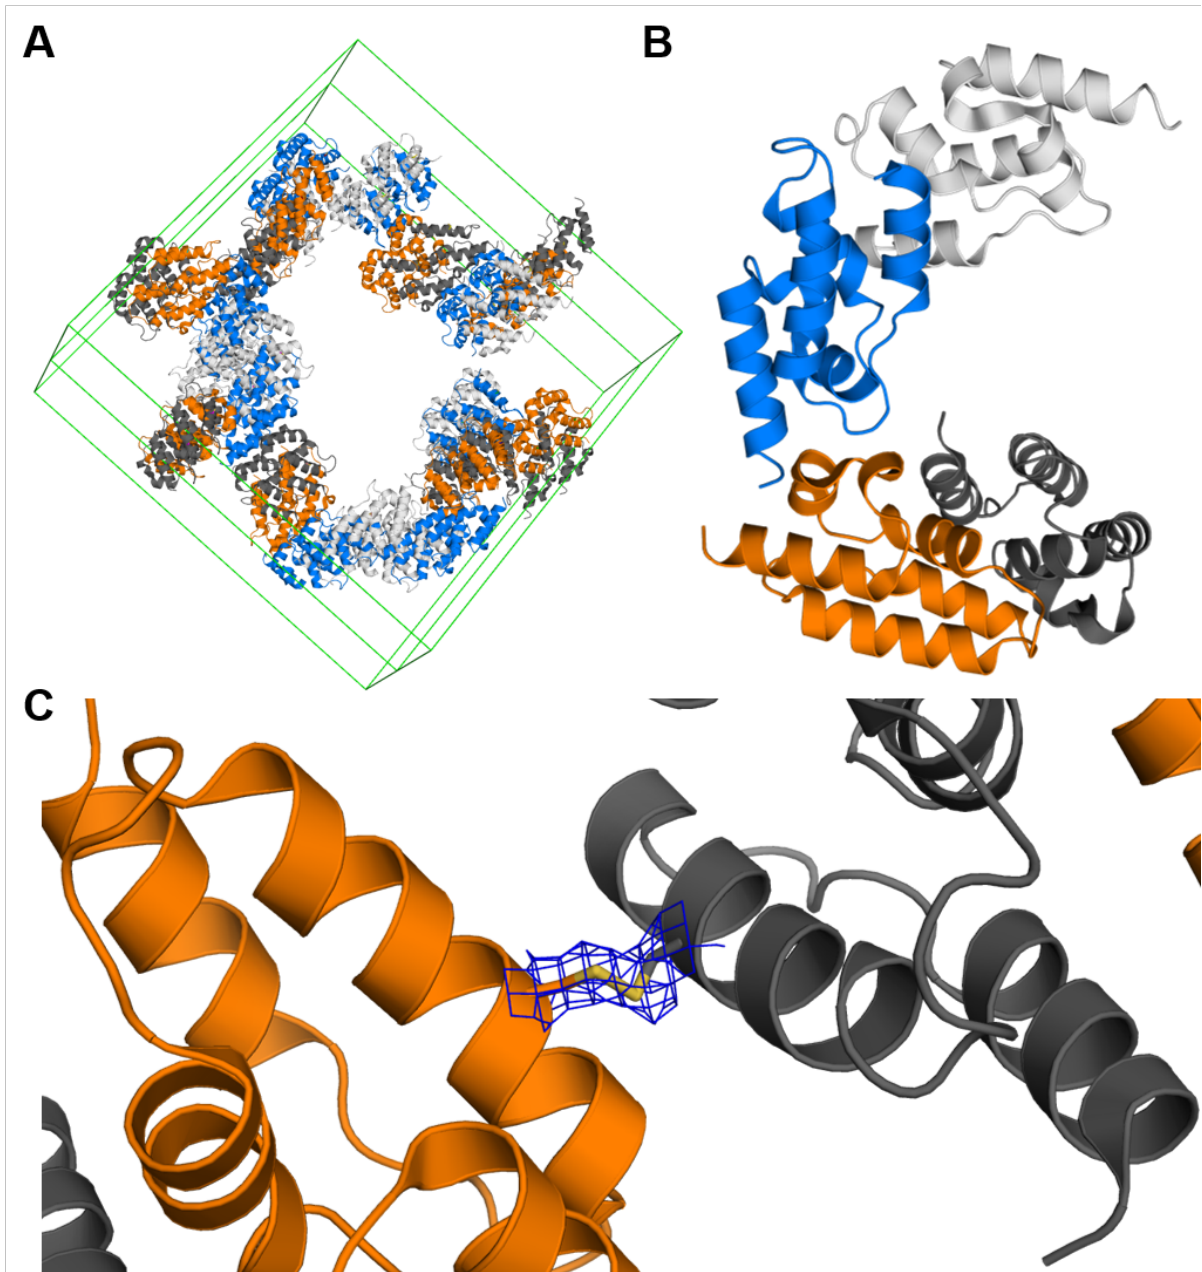

**S3 Fig. Crystal packing in dArc2-CL.** (A) The unit cell. (B) dArc2-CL is packed as homodimers. (C) In the crystal lattice, dimers are linked to each other *via* a disulfide bridge.
